# Supplementary material for: Taming diamines and acyl chlorides by carbon dioxide in selective mono-acylation reactions
Source: Royal Society of Chemistry journal article supplement (doi:10.1039/d2gc04478a), 2023-01-01
Supplement: d2gc04478a1.xlsx [file d2gc04478a1.xlsx]

## Sheet: Monoacylation
Methodology	DOI	Sourced from	Atom Efficiency	Mass Intensity	E Factor (without isolation)	E factor (with Solvent Recovery)	Total Process Waste	Total Process Mass	Mass of Product (g)	Mass of Reagents (g)	Solvent Mass (g)	Yield	Limiting mol	Product	MW (g/mol)	equivalents	Diamine	MW (g/mol)	mol	equivalents	Acylation agent	MW (g/mol)	mol	equivalents	Additive	MW (g/mol)	mol	equivalents	Solvent	Density (g/mL)	volumen (mL)
			Mass of product / Mass of reagents	Total process mass / Mass of Product	Total Process Waste / Mass of Product	(Mass of Reagents - Mass of Product) / Mass of Product	Total Process Mass - Mass of Product	Mass of Reagents + Solvent Mass
Wang-Meanwell Monoacylation (1999)	10.1021/jo9908501	Typical Procedure for Monobenzoylation: Preparation of N-(Benzoyl)piperazine 3a	53.6167	30.2619	29.2619	1.37729	51.4387	53.1966	1.75787	4.17898	49.0176	84	0.011	N-(Benzoyl)piperazine	190.246	1	piperazine	86.136	0.0116	1	Benzoyl chloride	140.57	0.011	1	n-BuLi	64.06	0.0255	2	THF	0.888	55.2
Verna-Kaushik Monoacylation (2010)	10.1021/ol101604q	SI: General Procedure A for Monoacylation of symmetrical diamines: Synthesis of Phenyl-piperazine-1-yl-methanone	43.6566	76.2565	75.2565	2.17677	114.538	116.06	1.52197	4.83494	111.225	80	0.01	N-(Benzoyl)piperazine	190.246	1	piperazine dihydrochloride	159.054	0.013	1	Benzoyl chloride	140.57	0.01	1	Imidazole	68.077	0.02	2	DCM	1.33	50
																													EtOH	0.789	25
																													H2O	1	25
Verna-Kaushik Monoacylation (2012)	10.1039/C1GC16314K	SI: General Procedure 1: monoacylation of symmetrical diamines: Synthesis of Phenyl-piperazin-1-yl-methanone	48.533	14.4699	13.4699	1.67375	22.8378	24.5332	1.69547	4.53325	20	83	0.01	2-phenyl-1-(piperazin-1-yl)ethanone	204.273	1	piperazine dihydrochloride	159.054	0.005	0.5	Phenyl acetic acid	136.15	0.01	1	CDI	162.15	0.012	1	H2O	1	20
																	piperazine	86.136	0.005	0.5
Zhang-Wang Monoacylation (2003)	10.1021/ol0300773	SI: General Procedure: Preparation of Compounds 8aa and 9aa	50.8875	52.359	51.359	1.56771	23.3188	23.7728	0.454035	1.16583	22.607	79	0.0035	N-benzoyl ethylene diamine	164.208	1	Ethylene diamine	60.1	0.0037	1	Benzoyl chloride	140.57	0.0035	1	9-BBN	122.018	0.0037	1	n-Hexane	0.655	7.4
																													THF	0.888	20
Agha-Abdel-Samii Monoacylation (2020)	10.1007/s00706-020-02579-5	General procedure for monoacylation of aliphatic diamines in n-butanol	54.8578	8.67333	7.67333	1.50737	10.0802	11.3938	1.31366	3.29384	8.1	80	0.01	N-benzoyl ethylene diamine	164.208	1	Ethylene diamine	60.1	0.015	1	N-Benzoyl benzotriazole	239.234	0.01	1					n-BuOH	0.81	10
Tang-Fang Monoacylation (2008)	10.1016/j.tetlet.2008.07.174	General procedure for mono-acylation of symmetric diamines	85.7165	1.76136	0.761357	0.440293	2.37136	5.486	3.11464	4.486	1	81	0.02	N-benzoyl-1,4-butanediamine	192.262	1	1,4-butanediamine	88.15	0.02	1	Methyl benzoate	136.15	0.02	1					H2O	1	1
Our procedure			83.0185	78.3948	77.3948	0.860854	26.8992	27.2468	0.347558	0.646755	26.6	78	0.0025	N-(2-aminoethyl)-2-phenylacetamide	178.235	1	Ethylene diamine	60.1	0.0025	1	Phenyl acetyl cloride	154.593	0.0025	1	CO2	44.009	0.0025	1	DCM	1.33	20
Our procedure, but big scale			83.0185	30.3653	29.3653	1.25009	94.2106	97.4188	3.20823	7.2188	90.2	72	0.025	N-(2-aminoethyl)-2-phenylacetamide	178.235	1	Ethylene diamine	60.1	0.0375	1	Phenyl acetyl cloride	154.593	0.025	1	CO2	44.009	0.025	1	ethyl acetate	0.902	100
Three-step synthesis	10.1021/jo961580e		57.5598	129.632	128.632	4.11337	1030.45	1038.46	8.01085	40.9625	997.5	100	0.05	N-Boc ethylene diamine	160.217	1	Ethylene diamine	60.1	0.5	1	Di-tert-butyl bicarbonate	218.249	0.05	1					DCM	1.33	750
	10.1016/j.bmcl.2013.10.017		88.419	17.5726	16.5726	0.663203	20.7816	22.0356	1.25398	2.08562	19.95	68	0.006625	tert-butyl (2-(2-phenylacetamido)ethyl)carbamate	278.352	1	N-Boc ethylene diamine	160.217	0.006625	1	Phenyl acetyl cloride	154.593	0.006625	1					DCM	1.33	15
			68.1976	157.034	156.034	15.3915	105.641	106.318	0.677034	11.0976	95.22	70	0.004505	N-(2-aminoethyl)-2-phenylacetamide hydrochloride	214.693	1	tert-butyl (2-(2-phenylacetamido)ethyl)carbamate	278.352	0.004505	1					HCl	36.458	0.27	1	DCM	1.33	45
																													iPrOH	0.786	45
			Atom Efficiency	Mass Intensity	E Factor (without isolation)	E factor (with Solvent Recovery)	Total Process Waste	Total Process Mass	Mass of Product (g)	Mass of Reagents (g)	Solvent Mass (g)	Total Yield	Limiting mol	Product	MW (g/mol)	equivalents	Diamine	MW (g/mol)	mol	equivalents	Acylation agent	MW (g/mol)	mol	equivalents	Additive	MW (g/mol)	mol	equivalents	Solvent	Density (g/mL)	volumen (mL)
			45.7378	389.395	388.395	23.0687	262.957	263.634	0.677034	16.2954	247.339	47.6	0.006625	N-(2-aminoethyl)-2-phenylacetamide hydrochloride	214.693	1	Ethylene diamine	60.1	0.06625	1	Phenyl acetyl cloride	154.593	0.006625	1	Di-tert-butyl bicarbonate	218.249	0.006625	1	DCM	1.33	159.375
																									HCl	36.458	0.27	1	iPrOH	0.786	45
